# Supplementary material
Source: PubMed Central journal article supplement (PMC7987301)
Supplement: mmc1.pdf [file mmc1.pdf]

# THE LANCET Microbe

## Supplementary appendix

This appendix formed part of the original submission and has been peer reviewed. We post it as supplied by the authors.

Supplement to: Chia WN, Zhu F, Ong SWX, et al. Dynamics of SARS-CoV-2 neutralising antibody responses and duration of immunity: a longitudinal study. *Lancet Microbe* 2021; published March 23. [https://doi.org/10.1016/S2666-5247\(21\)00025-2](https://doi.org/10.1016/S2666-5247(21)00025-2).

## Supplementary Materials

### **Dynamics of SARS-CoV-2 neutralising antibody responses and duration of immunity: a longitudinal study s**

Wan Ni Chia<sup>†</sup> PhD, Feng Zhu<sup>†</sup> PhD, Sean Wei Xiang Ong MBBS, Barnaby Edward Young, MBBChir, Siew-Wai Fong PhD, Nina Le Bert PhD, Chee Wah Tan PhD, Charles Tiu BS, Jinyan Zhang BS, Seow Yen Tan MBBS, Surinder Pada MBBS, Yi-Hao Chan PhD, Christine YL Tham PhD, Kamini Kunasegaran BS, Mark I-C Chen PhD, Jenny GH Low MPH, Yee-Sin Leo MPH, Laurent Renia PhD, Antonio Bertoletti MD, Lisa FP Ng PhD, David Chien Lye MBBS, Lin-Fa Wang PhD

## **Methods**

### **Patient cohort used in this study**

The duration of the study was 30 January 2020 to 14 August 2020 inclusive. While case definitions evolved throughout this period as part of enhanced surveillance in line with national public health policy, almost all patients with respiratory illnesses in Singapore are tested for COVID-19 with severe acute respiratory syndrome coronavirus 2 (SARS-CoV-2) polymerase chain reaction (PCR). All respiratory samples were collected by trained healthcare providers. Additionally, a large number of asymptomatic individuals were tested, namely close contacts of confirmed cases and individuals living in congregate settings (namely migrant worker dormitories where large outbreaks occurred). As a result, confirmed diagnoses in Singapore included a large proportion of mild and asymptomatic cases. During this period of the outbreak, all patients with confirmed COVID-19 infection were hospitalised for initial evaluation, regardless of illness severity. There was no target sample size for the study, and patients were invited to participate in the prospective cohort study on a best-effort basis. However, not all patients could be approached due to resource limitations at the peak of the outbreak.

SARS recalls were recruited between February to September in 2020. The inclusion criterion was previous confirmed SARS coronavirus infection and hospitalisation in Tan Tock Seng Hospital. SARS recall cases had to be asymptomatic at the time of enrolment but did not need to test negative for SARS-CoV-

2. However, there was a very limited circulation of SARS-CoV-2 in the community in Singapore at the time these subjects were recruited into our study, and hence it is highly unlikely that they were exposed to SARS-CoV-2.

### **Surrogate virus neutralisation test (sVNT) for SARS-CoV-2 and SARS-CoV**

Briefly, 50  $\mu$ l of hACE2 protein (Genscript) diluted to a final concentration of 2  $\mu$ g/ml in 100 mM carbonate buffer was coated on MaxiSORP plates (Nunc) overnight at 4°C, followed by blocking with OptEIA assay diluent (BD). An equal volume of 3 ng of HRP-SARS-CoV-2 Receptor Binding Domain (RBD) protein (Genscript) or HRP-SARS-CoV RBD protein (Genscript) was then mixed with test sera diluted to 1:10 and incubated at 37°C for 1 h. 50  $\mu$ l of pre-incubated sera/HRP-RBD mixture were next added to each hACE2 well and further incubated for 1 h at room temperature. Unbound HRP-RBD was washed off with copious volumes of PBST buffer and colourimetric signal developed using 3,3',5,5'-tetramethylbenzidine (TMB) (Invitrogen). TMB stop solution was added to stop the chromogenic reaction and the absorbance readings were acquired using Cytation 5 microplate reader (BioTek) at 450 nm and 570 nm. A 30% cut-off is used in the current study to ensure the high stringency of the assay specificity.

### **Determination of antibody avidity by ELISA**

Indirect RBD ELISA was used to measure the avidity of anti-RBD antibodies using quadruplicate wells. RBD proteins were diluted to a final concentration of 2  $\mu$ g/ml in carbonate buffer and coated on MaxiSORP plates overnight at 4°C, followed by blocking with OptEIA assay diluent (BD). Test sera were diluted to 1:100, added to ELISA plates and incubated at 37°C for 1 h. After the primary antibody was washed off with five washes of PBST buffer, 50  $\mu$ l of 6 M urea was added to duplicate wells and incubated at room temperature for 10 min. After five washes of PBST buffer, 1:10000 of HRP-anti-human IgG (Santa Cruz) was added and further incubated at 37°C for 30 min. The ELISA wells were washed with PBST buffer and the colourimetric signal was developed as described in the sVNT methodology above. Antibody avidity was calculated as a fraction of signal intensity change before and after urea treatment.

### **Multiplex microbead-based immunoassay**

The Cytokine/Chemokine/Growth Factor 45-plex Human ProcartaPlex™ Panel 1 panel includes granulocyte-macrophage colony-stimulating factor (GM-CSF), epidermal growth factor (EGF), brain-

derived neurotropic factor, beta-nerve growth factor (bNGF), basic fibroblast growth factor (FGF-2), hepatocyte growth factor (HGF), monocyte chemoattractant protein (MCP) 1, macrophage inflammatory protein (MIP) 1 $\alpha$ , MIP-1 $\beta$ , RANTES (regulated on activation, normal T cell expressed and secreted), chemokine (C-X-C motif) ligand (CXCL) 1 (GRO- $\alpha$ ), stromal cell-derived factor 1 (SDF-1 $\alpha$ ), interferon (IFN) gamma-induced protein 10 (IP-10), eotaxin, IFN- $\alpha$ , IFN- $\gamma$ , interleukin (IL)-1 $\alpha$ , IL-1 $\beta$ , IL-1RA, IL-2, IL-4, IL-5, IL-6, IL-7, IL-8, IL-9, IL-10, IL-12p70, IL-13, IL-15, IL-17A, IL-18, IL-21, IL-22, IL-23, IL-27, IL-31, leukemia inhibitory factor (LIF), stem cell factor (SCF), tumor necrosis factor (TNF- $\alpha$ ), TNF- $\beta$ , vascular endothelial growth factors A and D (VEGF-A, VEGF-D), platelet derived growth factor (PDGF-BB), and placental growth factor (PLGF-1). Standards and plasma from COVID-19 patients and healthy controls were incubated with fluorescent-coded magnetic beads pre-coated with respective antibodies in a black 96-well clear-bottom plate overnight at 4°C. After incubation, plates were washed 5 times with wash buffer (PBS with 1% BSA (Capricorn Scientific) and 0.01% Tween (Promega)). Sample-antibody-bead complexes were incubated with biotinylated detection antibodies for 1 hour and washed 5 times with wash buffer. Subsequently, Streptavidin-PE was added and incubated for another 30 mins. Plates were washed 5 times again before sample-antibody-bead complexes were re-suspended in sheath fluid for acquisition on the FLEXMAP® 3D (Luminex) using xPONENT® 4.0 (Luminex) software. Internal control samples were included in each Luminex assay to remove any potential plate effects. A correction factor was obtained from the readout differences observed from the internal control samples across the multiple assays and this correction factor was then used to normalise all the samples. Standard curves were generated with a 5-PL (5-parameter logistic) algorithm, reporting values for mean fluorescence intensity (MFI) and concentration data. The concentrations were logarithmically transformed to ensure normality.

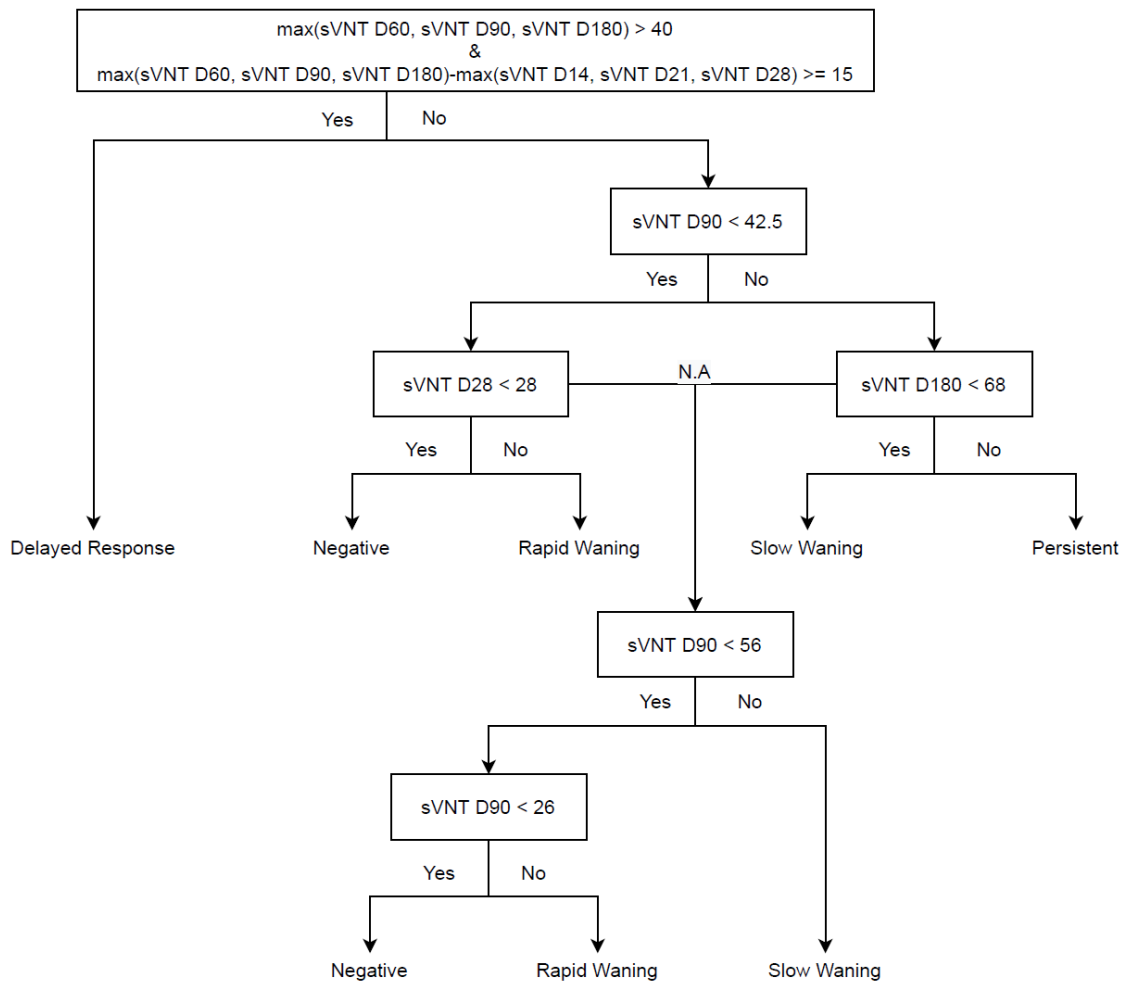

**Supp Figure 1.** Decision tree to classify the same grouping according to NAb at different timepoints. N.A.: 90 dpso data was used to further classify samples if 28 dpso or 180 dpso data was unavailable.

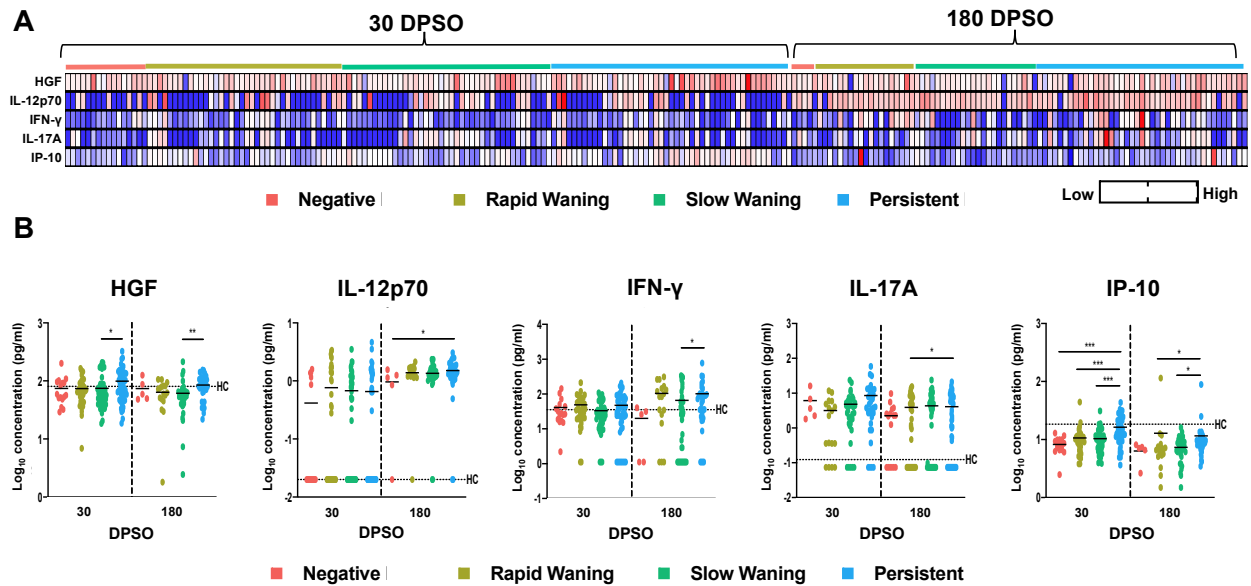

**Supp Figure 2.** Plasma immune mediator levels of COVID-19 patients grouped by SARS-CoV-2 neutralising antibody responses. Concentrations of 45 immune mediators were quantified using a 45-plex microbead-based immunoassay. (A) Heatmap of immune mediator levels in plasma samples of patients with different dynamics of SARS-CoV-2 neutralising antibody responses at 180 days post symptom onset. Each colour represents the relative concentration of a particular analyte. Blue and red indicate low and high concentration, respectively. (B) Profiles of significant immune mediators of COVID-19 patients across four groupings of SARS-CoV-2 neutralising antibody responses are illustrated as scatter plots. Immune mediator levels in plasma fraction samples from 30 days (Negative, n=16; Rapid Waning, n=37; Slow Waning, n=41; Persistent, n=48) and 180 days (Negative, n=5; Rapid Waning, n=17; Slow Waning, n=34; Persistent, n=33) post symptom onset were compared among the patients with different dynamics of neutralising antibody responses. Kruskal-Wallis with Dunn's post hoc tests were performed which discerned the differences between the groups (\*P < 0.05; \*\*P < 0.01; \*P < 0.001). Immune mediator levels for healthy controls (n = 23) are indicated by the black dotted line. Patient samples with concentration out of measurement range are presented as the value of logarithm transformation of Limit of Quantification.

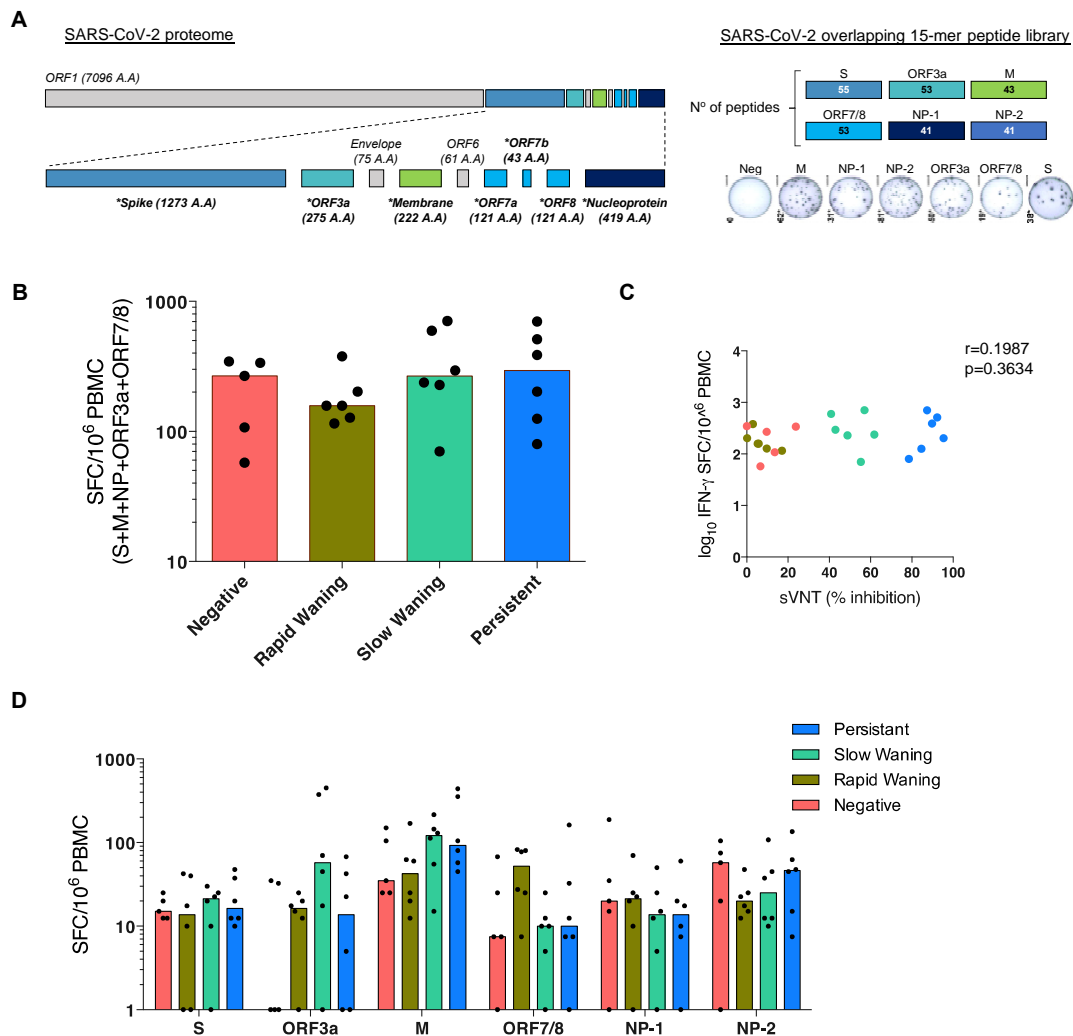

**Supp Figure 3.** Analysis of SARS-CoV-2 specific T-cell responses. (A) SARS-CoV-2 proteome organisation; analysed proteins are coloured and marked by \*. 15-mer peptides overlapping by 10 amino acids were split into pools covering ORF3a, membrane (M), ORF7 and ORF8 combined, nucleoprotein (NP1, NP-2) and selected 15-mers covering the more T cell-immunogenic regions of Spike (S). T cell reactivity was tested by ex-vivo IFN $\gamma$ -ELISpot. (B) Combined frequency of IFN $\gamma$ -secreting cells (SFC) reactive to the peptide pools of S, ORF3a, M, ORF7/8, NP-1 and NP-2 per 10<sup>6</sup> PBMC in COVID-19 convalescents 180 days post symptom onset. Patients are divided based on their profile of neutralising antibodies: Negative (n=5), Rapid Waning (n=6), Slow Waning (n=6), Persistent (n=6). (C) The magnitude of combined SARS-CoV-2-specific T cell responses to all measured peptide pools was correlated with the level of inhibition by virus neutralising antibodies a 477 t day 180 post symptom onset. Spearman correlation, p-value two-tailed. (D) Frequency of IFN $\gamma$ -secreting cells (SFU) reactive to the individual peptide pools of S, ORF3a, M, ORF7/8, NP-1 and NP-2 per 10<sup>6</sup> PBMC in COVID-19 convalescents at 180 days post symptom onset.

**Supplementary Table 1. Summary of sample details**

| Sample# | Sampling time points (days post symptom onset) | NAb dynamics Grouping (1=Negative; 2=Rapid Waning; 3=Slow Waning; 4=Persistent; 5=Delayed Response) | Observed NAb longevity (days) | Predicted NAb longevity (days) | Predicted NAb longevity confidence intervals (days) | Representative samples used for cytokine studies (Y=Yes) | Representative samples used for T-cell immunity studies (Y=Yes) |
|---------|------------------------------------------------|-----------------------------------------------------------------------------------------------------|-------------------------------|--------------------------------|-----------------------------------------------------|----------------------------------------------------------|-----------------------------------------------------------------|
| S2-1    | 16, 24, 32, 88, 177                            | 1                                                                                                   | NA                            | NA                             | NA                                                  | Y                                                        | Y                                                               |
| S2-2    | 19, 60, 92, 167                                | 1                                                                                                   | NA                            | NA                             | NA                                                  | Y                                                        | Y                                                               |
| S2-3    | 17, 31, 97                                     | 1                                                                                                   | 19                            | NA                             | NA                                                  | Y                                                        |                                                                 |
| S2-4    | 62, 104, 193                                   | 1                                                                                                   | NA                            | NA                             | NA                                                  | Y                                                        | Y                                                               |
| S2-5    | 16, 30, 184                                    | 1                                                                                                   | NA                            | NA                             | NA                                                  | Y                                                        | Y                                                               |
| S2-6    | 71, 111, 182                                   | 1                                                                                                   | NA                            | NA                             | NA                                                  |                                                          |                                                                 |
| S2-7    | 14, 29, 91, 171                                | 1                                                                                                   | NA                            | NA                             | NA                                                  | Y                                                        |                                                                 |
| S2-8    | 60, 95, 166                                    | 1                                                                                                   | NA                            | NA                             | NA                                                  | Y                                                        |                                                                 |
| S2-9    | 33, 165                                        | 1                                                                                                   | NA                            | NA                             | NA                                                  | Y                                                        |                                                                 |
| S2-10   | 15, 31, 99, 171                                | 1                                                                                                   | NA                            | NA                             | NA                                                  | Y                                                        |                                                                 |
| S2-11   | 32, 90                                         | 1                                                                                                   | NA                            | NA                             | NA                                                  | Y                                                        |                                                                 |
| S2-12   | 29, 94                                         | 1                                                                                                   | NA                            | NA                             | NA                                                  | Y                                                        |                                                                 |
| S2-13   | 28, 99, 169                                    | 1                                                                                                   | NA                            | NA                             | NA                                                  | Y                                                        |                                                                 |
| S2-14   | 15, 43, 92                                     | 1                                                                                                   | NA                            | NA                             | NA                                                  | Y                                                        |                                                                 |
| S2-15   | 35, 92, 161                                    | 1                                                                                                   | NA                            | NA                             | NA                                                  | Y                                                        |                                                                 |
| S2-16   | 31, 85                                         | 1                                                                                                   | NA                            | NA                             | NA                                                  |                                                          |                                                                 |
| S2-17   | 14, 29, 87                                     | 1                                                                                                   | NA                            | NA                             | NA                                                  | Y                                                        |                                                                 |
| S2-18   | 15, 31, 89                                     | 1                                                                                                   | NA                            | NA                             | NA                                                  | Y                                                        |                                                                 |
| S2-19   | 14, 28, 88                                     | 1                                                                                                   | NA                            | NA                             | NA                                                  | Y                                                        |                                                                 |
| S2-20   | 15, 22, 28, 90                                 | 2                                                                                                   | NA                            | 130                            | 109-150                                             | Y                                                        |                                                                 |
| S2-21   | 28, 90, 180                                    | 2                                                                                                   | 49                            | 50                             | 0-334                                               | Y                                                        |                                                                 |
| S2-22   | 28, 90                                         | 2                                                                                                   | NA                            | 96                             | NA                                                  | Y                                                        |                                                                 |
| S2-23   | 28, 90                                         | 2                                                                                                   | NA                            | 109                            | NA                                                  |                                                          |                                                                 |
| S2-24   | 14, 28, 90, 180                                | 2                                                                                                   | 75                            | 113                            | 0-231                                               | Y                                                        |                                                                 |
| S2-25   | 59, 140                                        | 2                                                                                                   | 139                           | 139                            | NA                                                  | Y                                                        |                                                                 |



|       |                        |   |     |     |         |   |   |
|-------|------------------------|---|-----|-----|---------|---|---|
| S2-26 | 22, 30, 148            | 2 | 125 | 123 | 103-143 | Y |   |
| S2-27 | 14, 21, 28,<br>95, 181 | 2 | 68  | 95  | 39-152  | Y | Y |
| S2-28 | 27, 181                | 2 | 120 | 120 | NA      | Y | Y |
| S2-29 | 16, 21, 30,<br>93, 179 | 2 | 100 | 115 | 89-142  | Y | Y |
| S2-30 | 21, 28, 86             | 2 | 31  | 40  | 0-118   |   |   |
| S2-31 | 28, 93, 169            | 2 | 55  | 58  | 0-206   | Y | Y |
| S2-32 | 14, 21, 34,<br>92, 182 | 2 | 140 | 142 | 110-173 | Y |   |
| S2-33 | 31, 86                 | 2 | NA  | 95  | NA      | Y |   |
| S2-34 | 24, 105,<br>175        | 2 | 105 | 118 | 0-244   | Y | Y |
| S2-35 | 57, 102,<br>179        | 2 | 135 | 139 | 44-234  | Y |   |
| S2-36 | 30, 93                 | 2 | 64  | 65  | NA      | Y |   |
| S2-37 | 7, 14, 27,<br>90, 168  | 2 | 76  | 72  | 12-132  | Y | Y |
| S2-38 | 21, 28,100             | 2 | NA  | 136 | 123-149 | Y |   |
| S2-39 | 33, 91, 180            | 2 | 130 | 131 | 128-135 | Y |   |
| S2-40 | 32, 90                 | 2 | NA  | 96  | NA      | Y |   |
| S2-41 | 46, 97, 167            | 2 | 61  | 61  | 0-187   | Y |   |
| S2-42 | 32, 97, 180            | 2 | 78  | 75  | 0-159   | Y |   |
| S2-43 | 33, 101                | 2 | NA  | 148 | NA      | Y |   |
| S2-44 | 69, 102,<br>180        | 2 | 95  | 113 | 0-333   | Y |   |
| S2-45 | 64, 106                | 2 | NA  | 139 | NA      |   |   |
| S2-46 | 28, 97, 169            | 2 | 130 | 132 | 0-272   | Y |   |
| S2-47 | 52, 99                 | 2 | NA  | 130 | NA      | Y |   |
| S2-48 | 30, 89, 169            | 2 | 100 | 99  | 67-131  | Y |   |
| S2-49 | 28, 89, 166            | 2 | 45  | 41  | 0-260   | Y |   |
| S2-50 | 34, 91, 173            | 2 | 76  | 93  | 0-334   | Y |   |
| S2-51 | 17, 39, 89,<br>180     | 2 | 55  | 68  | 4-133   |   |   |
| S2-52 | 43, 94, 170            | 2 | 142 | 142 | 4-281   | Y |   |
| S2-53 | 9, 16, 28, 97          | 2 | NA  | 88  | 0-198   | Y |   |
| S2-54 | 31, 91, 168            | 2 | 89  | 125 | 0-553   | Y |   |
| S2-55 | 14, 28, 91,<br>162     | 2 | 78  | 75  | 36-113  | Y |   |
| S2-56 | 44, 87                 | 2 | 85  | 84  | NA      |   |   |
| S2-57 | 14, 28, 91             | 2 | 88  | 84  | 0-274   | Y |   |
| S2-58 | 28, 91                 | 2 | NA  | 114 | NA      | Y |   |
| S2-59 | 16, 28, 77             | 2 | 27  | 42  | 0-187   | Y |   |
| S2-60 | 18, 28, 88             | 2 | 26  | 35  | 0-153   | Y |   |
| S2-61 | 14, 28, 79             | 2 | 50  | 49  | 3-96    | Y |   |

|       |                         |   |     |     |         |   |   |
|-------|-------------------------|---|-----|-----|---------|---|---|
| S2-62 | 14, 29, 81              | 2 | 78  | 78  | 0-270   | Y |   |
| S2-63 | 20, 28, 78              | 2 | NA  | 94  | 77-111  | Y |   |
| S2-64 | 28, 90, 180             | 3 | NA  | 217 | 0-537   | Y | Y |
| S2-65 | 14, 28, 90,<br>180      | 3 | NA  | 261 | 229-294 | Y |   |
| S2-66 | 23, 31, 102,<br>180     | 3 | NA  | 171 | 0-419   | Y |   |
| S2-67 | 23, 31, 102,<br>180     | 3 | NA  | 288 | 200-376 | Y |   |
| S2-68 | 13, 20, 27,<br>90, 188  | 3 | NA  | 231 | 47-416  | Y |   |
| S2-69 | 14, 22, 29,<br>92, 182  | 3 | NA  | 178 | 98-259  | Y |   |
| S2-70 | 18, 25, 95,<br>180      | 3 | NA  | 215 | 0-522   | Y | Y |
| S2-71 | 18, 25, 32,<br>110, 193 | 3 | NA  | 197 | 76-318  | Y |   |
| S2-72 | 19, 26, 96,<br>180      | 3 | 178 | 162 | 86-238  | Y |   |
| S2-73 | 19, 25, 92,<br>179      | 3 | NA  | 184 | 46-321  | Y |   |
| S2-74 | 17, 23, 30,<br>92, 179  | 3 | NA  | 308 | 197-419 | Y | Y |
| S2-75 | 34, 92, 183             | 3 | NA  | 160 | 0-773   | Y |   |
| S2-76 | 15, 31, 89,<br>180      | 3 | NA  | 248 | 0-513   | Y | Y |
| S2-77 | 20, 29, 91,<br>180      | 3 | 166 | 158 | 94-222  | Y |   |
| S2-78 | 17, 29, 86,<br>179      | 3 | 160 | 156 | 66-245  | Y |   |
| S2-79 | 16, 31, 106,<br>181     | 3 | NA  | 190 | 170-210 | Y |   |
| S2-80 | 27, 92, 187             | 3 | NA  | 336 | 0-1104  | Y |   |
| S2-81 | 33, 91, 190             | 3 | 165 | 163 | 95-231  | Y |   |
| S2-82 | 35, 86, 192             | 3 | 115 | 146 | 0-719   | Y |   |
| S2-83 | 20, 33, 96,<br>210      | 3 | 155 | 159 | 32-285  | Y |   |
| S2-84 | 16, 28, 89              | 3 | NA  | 201 | 0-491   | Y |   |
| S2-85 | 35, 106,<br>181         | 3 | NA  | 233 | 0-574   | Y | Y |
| S2-86 | 18, 31, 97,<br>180      | 3 | NA  | 307 | 212-402 | Y |   |
| S2-87 | 31, 86, 184             | 3 | NA  | 209 | 0-817   | Y |   |
| S2-88 | 46, 103,<br>208         | 3 | NA  | 174 | 0-1112  | Y |   |

|        |                         |   |     |      |          |   |   |
|--------|-------------------------|---|-----|------|----------|---|---|
| S2-89  | 44, 99, 172             | 3 | NA  | 277  | 0-825    | Y |   |
| S2-90  | 32, 95, 180             | 3 | 130 | 150  | 0-449    | Y |   |
| S2-91  | 54, 106,<br>183         | 3 | NA  | 168  | 0-547    | Y |   |
| S2-92  | 43, 99, 175             | 3 | 166 | 163  | 0-333    | Y |   |
| S2-93  | 28, 98, 177             | 3 | NA  | 275  | 0-940    | Y | Y |
| S2-94  | 15, 29, 177             | 3 | NA  | 321  | 46-595   | Y |   |
| S2-95  | 20, 43, 103,<br>180     | 3 | 165 | 149  | 56-242   | Y |   |
| S2-96  | 33, 89, 180             | 3 | NA  | 259  | 0-678    | Y |   |
| S2-97  | 31, 120,<br>175         | 3 | NA  | 320  | 0-802    | Y |   |
| S2-98  | 28, 97, 187             | 3 | NA  | 228  | 151-305  | Y |   |
| S2-99  | 72, 94, 168             | 3 | NA  | 211  | 16-407   |   |   |
| S2-100 | 64, 91, 182             | 3 | NA  | 212  | 7-416    |   |   |
| S2-101 | 17, 30, 90              | 3 | NA  | 201  | 98-304   | Y |   |
| S2-102 | 31, 86                  | 3 | NA  | 244  | NA       | Y |   |
| S2-103 | 29, 91, 168             | 3 | NA  | 202  | 43-362   | Y |   |
| S2-104 | 28, 93, 170             | 3 | 160 | 160  | 0-550    | Y |   |
| S2-105 | 9, 16, 28, 97           | 3 | NA  | 164  | 125-202  | Y |   |
| S2-106 | 36, 93, 167             | 3 | NA  | 175  | 0-508    | Y |   |
| S2-107 | 35, 90, 168             | 3 | NA  | 146  | 0-638    | Y |   |
| S2-108 | 23, 90                  | 3 | NA  | 320  | NA       |   |   |
| S2-109 | 29, 87                  | 3 | NA  | 178  | NA       |   |   |
| S2-110 | 28, 90, 180             | 4 | NA  | 574  | 0-1928   | Y |   |
| S2-111 | 28, 90, 180             | 4 | NA  | 1516 | 0-7466   | Y |   |
| S2-112 | 14, 28, 90,<br>180      | 4 | NA  | 737  | 225-1250 | Y |   |
| S2-113 | 7, 14, 28,<br>90, 180   | 4 | NA  | 693  | 174-1213 |   |   |
| S2-114 | 14, 28, 90,<br>180      | 4 | NA  | 360  | 209-511  | Y |   |
| S2-115 | 20, 27, 94,<br>180, 187 | 4 | NA  | 464  | 347-581  | Y |   |
| S2-116 | 20, 28, 91              | 4 | NA  | NA   | NA       |   |   |
| S2-117 | 14, 21, 28,<br>96, 181  | 4 | NA  | 931  | 407-1456 | Y |   |
| S2-118 | 11, 17, 24,<br>90       | 4 | NA  | 343  | 74-613   |   |   |
| S2-119 | 16, 23, 33,<br>93, 170  | 4 | NA  | 1704 | 155-3253 | Y | Y |
| S2-120 | 14, 21, 34,<br>90, 184  | 4 | NA  | 514  | 381-647  | Y |   |
| S2-121 | 12, 19, 31,<br>88, 183  | 4 | NA  | 686  | 0-2699   | Y |   |

|        |                         |   |    |       |           |   |   |
|--------|-------------------------|---|----|-------|-----------|---|---|
| S2-122 | 22, 32, 90,<br>180, 207 | 4 | NA | 375   | 327-423   | Y |   |
| S2-123 | 20, 28, 90,<br>180      | 4 | NA | 348   | 0-3437    | Y |   |
| S2-124 | 29, 86, 178             | 4 | NA | 538   | 101-974   | Y |   |
| S2-125 | 30, 93, 185             | 4 | NA | 361   | 0-1583    | Y |   |
| S2-126 | 7, 15, 27,<br>96, 179   | 4 | NA | 867   | 162-1572  | Y | Y |
| S2-127 | 15, 28, 96,<br>167      | 4 | NA | 1663  | 0-4733    | Y |   |
| S2-128 | 16, 33, 97,<br>180      | 4 | NA | 530   | 140-921   | Y |   |
| S2-129 | 18, 32, 99,<br>183      | 4 | NA | 368   | 0-1395    | Y |   |
| S2-130 | 16, 25, 99,<br>175      | 4 | NA | 651   | 400-902   | Y | Y |
| S2-131 | 32, 100,<br>179         | 4 | NA | 1884  | 0-18628   | Y | Y |
| S2-132 | 15, 30, 107,<br>178     | 4 | NA | 500   | 0-1135    | Y |   |
| S2-133 | 59, 120,<br>181         | 4 | NA | 326   | 0-1735    | Y |   |
| S2-134 | 33, 110,<br>167         | 4 | NA | 14881 | 1-119570  | Y |   |
| S2-135 | 27, 103,<br>183         | 4 | NA | 2186  | 0-4988    | Y | Y |
| S2-136 | 26, 46, 101,<br>179     | 4 | NA | 431   | 0-875     | Y |   |
| S2-137 | 16, 29, 101,<br>182     | 4 | NA | 474   | 202-745   | Y |   |
| S2-138 | 29, 114,<br>178         | 4 | NA | NA    | NA        | Y |   |
| S2-139 | 20, 34, 100,<br>178     | 4 | NA | 2161  | 0-10142   | Y |   |
| S2-140 | 19, 32, 98,<br>179      | 4 | NA | 416   | 387-444   | Y |   |
| S2-141 | 34, 98, 180             | 4 | NA | 4287  | 0-69054   | Y |   |
| S2-142 | 28, 98, 182             | 4 | NA | 4358  | 0-24274   | Y |   |
| S2-143 | 16, 29, 93,<br>180      | 4 | NA | NA    | NA        | Y |   |
| S2-144 | 17, 28, 90,<br>168      | 4 | NA | 3629  | 2456-4801 | Y | Y |
| S2-145 | 48, 85, 167             | 4 | NA | 1384  | 0-5427    | Y |   |
| S2-146 | 30, 93, 179             | 4 | NA | NA    | NA        | Y |   |
| S2-147 | 30, 90, 180             | 4 | NA | 580   | 0-2620    | Y |   |

|        |                        |   |    |      |          |   |  |
|--------|------------------------|---|----|------|----------|---|--|
| S2-148 | 32, 91, 180            | 4 | NA | 8728 | 0-123605 | Y |  |
| S2-149 | 13, 27, 91,<br>176     | 4 | NA | NA   | NA       | Y |  |
| S2-150 | 29, 92, 179            | 4 | NA | 2682 | 0-11263  | Y |  |
| S2-151 | 28, 90, 178            | 4 | NA | 2172 | 0-18620  | Y |  |
| S2-152 | 19, 30, 91,<br>180     | 4 | NA | 520  | 0-1098   | Y |  |
| S2-153 | 71, 104,<br>167        | 4 | NA | 501  | 411-592  |   |  |
| S2-154 | 78, 179                | 4 | NA | 5497 | NA       |   |  |
| S2-155 | 55, 103,<br>167        | 4 | NA | 364  | 0-1420   |   |  |
| S2-156 | 28, 91, 167            | 4 | NA | 956  | 0-8969   | Y |  |
| S2-157 | 42, 92, 175            | 4 | NA | 546  | 0-2389   | Y |  |
| S2-158 | 30, 89, 164            | 4 | NA | 566  | 0-3457   |   |  |
| S2-159 | 43, 93, 168            | 4 | NA | NA   | NA       | Y |  |
| S2-160 | 14, 28, 87             | 4 | NA | NA   | NA       | Y |  |
| S2-161 | 25, 92                 | 4 | NA | 548  | NA       | Y |  |
| S2-162 | 15, 23, 31,<br>92, 180 | 5 | NA | NA   | NA       |   |  |
| S2-163 | 57, 100,<br>167        | 5 | NA | NA   | NA       |   |  |
| S2-164 | 14, 28, 104,<br>182    | 5 | NA | NA   | NA       |   |  |

**Supplementary Table 2. Level of NAb determined by sVNT for SARS-CoV**

| Sample group                                                      | Sample # | % inhibition |
|-------------------------------------------------------------------|----------|--------------|
| SARS patients recalled in 2020 (17 years after initial infection) | S1-1     | 96.92        |
|                                                                   | S1-2     | 81.92        |
|                                                                   | S1-3     | 75.83        |
|                                                                   | S1-4     | 99.46        |
|                                                                   | S1-5     | 51.08        |
|                                                                   | S1-6     | 94.66        |
|                                                                   | S1-7     | 83.72        |
|                                                                   | S1-8     | 80.96        |
|                                                                   | S1-9     | 82.76        |
|                                                                   | S1-10    | 27.56        |
|                                                                   | S1-11    | 99.60        |
|                                                                   | S1-12    | 72.10        |
|                                                                   | S1-13    | 98.41        |
|                                                                   | S1-14    | 99.07        |
|                                                                   | S1-15    | 84.39        |
|                                                                   | S1-16    | 99.07        |
|                                                                   | S1-17    | 86.77        |
|                                                                   | S1-18    | 21.19        |
|                                                                   | S1-19    | 85.89        |
|                                                                   | S1-20    | 82.50        |
| COVID-19 patients sampled in 2020                                 | S2-165   | -6.38        |
|                                                                   | S2-166   | -1.81        |
|                                                                   | S2-167   | 2.83         |
|                                                                   | S2-168   | -0.86        |
|                                                                   | S2-169   | 6.82         |
|                                                                   | S2-170   | 11.39        |
| Healthy controls sampled before December 2019                     | HC-1     | 11.60        |
|                                                                   | HC-2     | 15.59        |
|                                                                   | HC-3     | 18.72        |
|                                                                   | HC-4     | 25.86        |
|                                                                   | HC-5     | -4.10        |
|                                                                   | HC-6     | 1.86         |
|                                                                   | HC-7     | 4.49         |
|                                                                   | HC-8     | 8.76         |
|                                                                   | HC-9     | 9.32         |
|                                                                   | HC-10    | 18.42        |

**Supplementary Table 3. Clinical characteristics of cohort subset selected for T cell analysis**

| <b>Patient characteristics</b>     | <b>T cell subset (n = 23)</b> |
|------------------------------------|-------------------------------|
| Age, years                         | 52 (25 – 72)                  |
| Sex, female                        | 10 (43.5%)                    |
| Ethnicity                          |                               |
| Chinese                            | 20 (87.0%)                    |
| Malay                              | 2 (8.7%)                      |
| South Asian (Indian / Bangladeshi) | 0 (0.0%)                      |
| Others                             | 1 (4.3%)                      |
| Any comorbidity                    | 12 (52.2%)                    |
| Diabetes                           | 4 (17.4%)                     |
| Hypertension                       | 9 (39.1%)                     |

**Supplementary Table 4. SARS-CoV-2 overlapping peptide library used in T cell assays**

| NP-1 peptide pool   |                     | NP-2 peptide pool   |                     |
|---------------------|---------------------|---------------------|---------------------|
| Amino Acid Sequence | Amino Acid Position | Amino Acid Sequence | Amino Acid Position |
| MSDNQPQNQRNAPRI     | 1-15                | SPARMAGNGGDAALA     | 206-220             |
| PQNQRNAPRITFGGP     | 6-20                | AGNGGDAALALLLD      | 211-225             |
| NAPRITFGGSPDSTG     | 11-25               | DAALALLLDRLNQL      | 216-230             |
| TFGGPSDSTGSNQNG     | 16-30               | LLLLDRLNQLESKMS     | 221-235             |
| SDSTGSNQNGERSGA     | 21-35               | RLNQLESKMSGKGQQ     | 226-240             |
| SNQNGERSGARSKQR     | 26-40               | ESKMSGKGQQQQGQT     | 231-245             |
| ERSGARSKQRRPQGL     | 31-45               | GKGQQQQGQTVTKKS     | 236-250             |
| RSKQRRPQGLPNNTA     | 36-50               | QQGQTVTKKSAAEAS     | 241-255             |
| RPQGLPNNTASWFTA     | 41-55               | VTKKSAAEASKKPRQ     | 246-260             |
| PNNTASWFTALTQHG     | 46-60               | AAEASKKPRQKRTAT     | 251-265             |
| SWFTALTQHGKEDLK     | 51-65               | KKPRQKRTATKAYNV     | 256-270             |
| LTQHGKEDLKFPRGQ     | 56-70               | KRTATKAYNVTQAFG     | 261-275             |
| KEDLKFPRGQGVPIIN    | 61-75               | KAYNVTQAFGRRGPE     | 266-280             |
| FPRGQGVPIINTNSSP    | 66-80               | TQAFGRRGPEQTQGN     | 271-285             |
| GVPINTNSSPDDQIG     | 71-85               | RRGPEQTQGNFGDQE     | 276-290             |
| TNSSPDDQIGYYRRA     | 76-90               | QTQGNFGDQELIRQG     | 281-295             |
| DDQIGYYRRATRRIR     | 81-95               | FGDQELIRQGTDYKH     | 286-300             |
| YYRRATRRIRGGDGK     | 86-100              | LIRQGTDYKHWPQIA     | 291-305             |
| TRRIRGGDGKMKDLS     | 91-105              | TDYKHWPQIAQFAPS     | 296-310             |
| GGDGKMKDLSRWYF      | 96-110              | WPQIAQFAPSASAFF     | 301-315             |
| MKDLSRWYFYLLGT      | 101-115             | QFAPSASAFFGMSRI     | 306-320             |
| PRWYFYLLGTGPEAG     | 106-120             | ASAFFGMSRIGMEVT     | 311-325             |
| YYLLGTGPEAGLPYGA    | 111-125             | GMSRIGMEVTPSGTW     | 316-330             |
| GPEAGLPYGANKDGI     | 116-130             | GMEVTPSGTWLTYTG     | 321-335             |
| LPYGANKDGIWVAT      | 121-135             | PSGTWLTGTGAIKLD     | 326-340             |
| NKDGIIWVATEGALN     | 126-140             | LYTGTGAIKLDDKDPN    | 331-345             |
| IWVATEGALNTPKDH     | 131-145             | AIKLDDKDPNFKDQV     | 336-350             |
| EGALNTPKDHIGTRN     | 136-150             | DKDPNFKDQVILLNK     | 341-355             |
| TPKDHIGTRNPANNA     | 141-155             | FKDQVILLNKHIDAY     | 346-360             |
| IGTRNPANNAIIVLQ     | 146-160             | ILLNKHIDAYKTFPP     | 351-365             |
| PANNAIIVLQLPQGT     | 151-165             | HIDAYKTFPPTEPKK     | 356-370             |
| AIVLQLPQGTTLPKG     | 156-170             | KTFPPTEPKKDKKKK     | 361-375             |
| LPQGTTLPKGFYAEG     | 161-175             | TEPKKDKKKKADETQ     | 366-380             |
| TLPKGFYAEGSRGGS     | 166-180             | DKKKKADETQALPQR     | 371-385             |
| FYAEGSRGGSQASSR     | 171-185             | ADETQALPQRQKKQQ     | 376-390             |



|                 |         |                 |         |
|-----------------|---------|-----------------|---------|
| SRGGSQASSRSSRS  | 176-190 | ALPQRQKKQQTVLL  | 381-395 |
| QASSRSSSRNRSSR  | 181-195 | QKKQQTVLLPAADL  | 386-400 |
| SSSRNRSSRNSTPG  | 186-200 | TVLLPAADLDDFSK  | 391-405 |
| RNSSRNSTPGSSRGT | 191-205 | PAADLDDFSKQLQQS | 396-410 |
| NSTPGSSRGTSPARM | 196-210 | DDFSKQLQQSMSSAD | 401-415 |
| SSRGTSPARMAGNGG | 201-215 | QLQQSMSSADSTQA  | 406-419 |

| <b>M peptide pool</b>      |                            | <b>ORF3a peptide pool</b>  |                            |
|----------------------------|----------------------------|----------------------------|----------------------------|
| <b>Amino Acid Sequence</b> | <b>Amino Acid Position</b> | <b>Amino Acid Sequence</b> | <b>Amino Acid Position</b> |
| MADSNGTITVEELKK            | 1-15                       | MDLFMRIFTIGTVTL            | 1-15                       |
| GTITVEELKKLLEQW            | 6-20                       | RIFTIGTVTLKQGEI            | 6-20                       |
| EELKKLLEQWNLVIG            | 11-25                      | GTVTLKQGEIKDATP            | 11-25                      |
| LLEQWNLVIGFLFLT            | 16-30                      | KQGEIKDATPSDFVR            | 16-30                      |
| NLVIGFLFTWICLL             | 21-35                      | KDATPSDFVRATATI            | 21-35                      |
| FLFLTWICLLQFAYA            | 26-40                      | SDFVRATATIQAS              | 26-40                      |
| WICLLQFAYANRNRF            | 31-45                      | ATATIQASLPFGW              | 31-45                      |
| QFAYANRNRFYIIK             | 36-50                      | PIQASLPFGWLIVGV            | 36-50                      |
| NRNRFYIIKLIFLW             | 41-55                      | LPFGWLIVGVALLAV            | 41-55                      |
| LYIIKLIFLWLLWPV            | 46-60                      | LIVGVALLAVFQSAS            | 46-60                      |
| LIFLWLLWPVTLACF            | 51-65                      | ALLAVFQSASKIITL            | 51-65                      |
| LLWPVTLACFVLA AV           | 56-70                      | FQSASKIITLKKRWQ            | 56-70                      |
| TLACFVLA AVYRINW           | 61-75                      | KIITLKKRWQLALSK            | 61-75                      |
| VLA AVYRINWITGGI           | 66-80                      | KKRWQLALSKGVHFV            | 66-80                      |
| YRINWITGGIAIAMA            | 71-85                      | LALSKGVHFVCNLLL            | 71-85                      |
| ITGGIAIAMA CLVGL           | 76-90                      | GVHFVCNLLLLFVTV            | 76-90                      |
| AIAMA CLVGLMWLSY           | 81-95                      | CNLLLLFVTYVYSHLL           | 81-95                      |
| CLVGLMWLSYFIASF            | 86-100                     | LFVTYVYSHLLLVAAG           | 86-100                     |
| MWLSYFIASFRLFAR            | 91-105                     | YSHLLLVAAGLEAPF            | 91-105                     |
| FIASFRLFARTRSMW            | 96-110                     | LVAAGLEAPFLYLYA            | 96-110                     |
| RLFARTRSMWSFNPE            | 101-115                    | LEAPFLYLYALVYFL            | 101-115                    |
| TRSMWSFNPETNILL            | 106-120                    | LYLYALVYFLQSINF            | 106-120                    |
| SFNPETNILLNVPLH            | 111-125                    | LVYFLQSINFVRIIM            | 111-125                    |
| TNILLNVPLHG TILT           | 116-130                    | QSINFVRIIMRLWLC            | 116-130                    |
| NVPLHG TILTRP LLE          | 121-135                    | VRIIMRLWLCWKCRS            | 121-135                    |
| GTILTRP LLESELVI           | 126-140                    | RLWLCWKCRSKNPLL            | 126-140                    |
| RP LLESELVIGAVIL           | 131-145                    | WKCRSKNPLLYDANY            | 131-145                    |
| SELVIGAVILRGHLR            | 136-150                    | KNPLLYDANYFLCWH            | 136-150                    |
| GAVILRGHLRIAGHH            | 141-155                    | YDANYFLCWHTNCYD            | 141-155                    |

|                 |         |                  |         |
|-----------------|---------|------------------|---------|
| RGHLRIAGHHLGRCD | 146-160 | FLCWHTNCYDYCIPY  | 146-160 |
| IAGHHLGRCDIKDLP | 151-165 | TNCYDYCIPYNSVTS  | 151-165 |
| LGRCDIKDLPEITV  | 156-170 | YCIPYNSVTSSIVIT  | 156-170 |
| IKDLPKEITVATSRT | 161-175 | NSVTSSIVITSGDGT  | 161-175 |
| KEITVATSRTLSEYK | 166-180 | SIVITSGDGTTSPIIS | 166-180 |
| ATSRTLSEYKLGASQ | 171-185 | SGDGTTSPISEHDYQ  | 171-185 |
| LSYKLGASQRVAGD  | 176-190 | TSPISEHDYQIGGYT  | 176-190 |
| LGASQRVAGDSGFAA | 181-195 | EHDYQIGGYTEKWES  | 181-195 |
| RVAGDSGFAAYSRYR | 186-200 | IGGYTEKWESGVKDC  | 186-200 |
| SGFAAYSRYRIGNYK | 191-205 | EKWESGVKDCVVLHS  | 191-205 |
| YSRYRIGNYKLNTDH | 196-210 | GVKDCVVLHSYFTSD  | 196-210 |
| IGNYKLNTDHSSSD  | 201-215 | VVLHSYFTSDYYQLY  | 201-215 |
| LNTDHSSSDNIALL  | 206-220 | YFTSDYYQLYSTQLS  | 206-220 |
| SSSDNIALLVQ     | 211-222 | YYQLYSTQLSTDTGV  | 211-225 |
|                 |         | STQLSTDTGVEHVTF  | 216-230 |
|                 |         | TDTGVEHVTFFIYNK  | 221-235 |
|                 |         | EHVTFFIYNKIVDEP  | 226-240 |
|                 |         | FIYNKIVDEPEEHVQ  | 231-245 |
|                 |         | IVDEPEEHVQIHTID  | 236-250 |
|                 |         | EEHVQIHTIDGSSGV  | 241-255 |
|                 |         | IHTIDGSSGVVNPVM  | 246-260 |
|                 |         | GSSGVVNPVMEPIYD  | 251-265 |
|                 |         | VNPVMEPIYDEPTTT  | 256-270 |
|                 |         | EPIYDEPTTTTSVPL  | 261-275 |

| <b>S peptide pool</b>      |                            | <b>ORF7/8 peptide pool</b> |                            |
|----------------------------|----------------------------|----------------------------|----------------------------|
| <b>Amino Acid Sequence</b> | <b>Amino Acid Position</b> | <b>Amino Acid Sequence</b> | <b>Amino Acid Position</b> |
| IRGWIFGTTLDSKTQ            | 101-115                    | MKIILFLALITLATC            | 1-15                       |
| FGTTLDSKTQSLIV             | 106-120                    | FLALITLATCELYHY            | 6-20                       |
| CTFEYVSQPFLMDLE            | 166-180                    | TLATCELYHYQECVR            | 11-25                      |
| VSQPFLMDLEGKQGN            | 171-185                    | ELYHYQECVRGTTVL            | 16-30                      |
| TRFQTLALHRSYLT             | 236-250                    | QECVRGTTVLLKEPC            | 21-35                      |
| LLALHRSYLTPGDSS            | 241-255                    | GTTVLLKEPCSSGTY            | 26-40                      |
| RSYLTPGDSSSGWTA            | 246-260                    | LKEPCSSGTYEGNSP            | 31-45                      |
| CALDPLSEKCTLKS             | 291-305                    | SSGTYEGNSPFHPLA            | 36-50                      |
| LSEKCTLKSFTVEK             | 296-310                    | EGNSPFHPLADNKFA            | 41-55                      |
| CTLKSFTVEKGIYQT            | 301-315                    | FHPLADNKFALTCFS            | 46-60                      |
| FTVEKGIYQTSNFRV            | 306-320                    | DNKFALTCFSTQFAF            | 51-65                      |

|                  |           |                  |         |
|------------------|-----------|------------------|---------|
| GIYQTSNFRVQPTES  | 311-325   | LTCFSTQFAFACPDG  | 56-70   |
| SASFSTFKCYGVSPT  | 371-385   | TQFAFACPDGVKHVY  | 61-75   |
| TFKCYGVSPTKLNLDL | 376-390   | ACPDGVKHVYQLRAR  | 66-80   |
| YNYKLPDDFTGCVIA  | 421-435   | VKHVYQLRARSVSPK  | 71-85   |
| WNSNNLDSKVGGNYN  | 436-450   | QLRARSVSPKLFIRQ  | 76-90   |
| LDSKVGGNYNLYRL   | 441-455   | SVSPKLFIRQEEVQE  | 81-95   |
| GGNYNYLYRLFRKSN  | 446-460   | LFIRQEEVQELYSPI  | 86-100  |
| YLYRLFRKSNLKPFE  | 451-465   | EEVQELYSPIFLIVA  | 91-105  |
| FRKSNLKPFERDIST  | 456-470   | LYSPIFLIVAAIVFI  | 96-110  |
| LKPFERDISTEIQQA  | 461-475   | FLIVAAIVFITLCFT  | 101-115 |
| GPKKSTNLVKNKCVN  | 526-540   | AIVFITLCFTLKRKT  | 106-120 |
| TNLVKNKCVNFNFNG  | 531-545   | TLCFTLKRKTE      | 111-121 |
| FNFNGLTGTGVLTES  | 541-555   | MIELSLIDFYLCFLA  | 1-15    |
| LTGTGVLTESNKKFL  | 546-560   | VLIMLIIFWFSLELQ  | 21-35   |
| RAGCLIGAEHVNNNSY | 646-660   | IIFWFSLELQDHNET  | 26-40   |
| IGAEHVNNSYECDIP  | 651-665   | SLELQDHNETCHA    | 31-43   |
| SVASQSIAYTMSLG   | 686-700   | MKFLVFLGIITVAA   | 1-15    |
| SIIAYTMSLGAENSV  | 691-705   | FLGIITVAAFHQEC   | 6-20    |
| TMSLGAENSVAYSNN  | 696-710   | TTVAAFHQECSLQSC  | 11-25   |
| STECSNLLLQYGSFC  | 746-760   | FHQECSLQSQCTQHQP | 16-30   |
| NLLLQYGSFCTQLNR  | 751-765   | SLQSQCTQHQPYYVDD | 21-35   |
| KNTQEVFAQVKQIYK  | 776-790   | TQHQPYYVDDPCPIH  | 26-40   |
| VFAQVKQIYKTPPIK  | 781-795   | YVDDPCPIHFYSKW   | 31-45   |
| KQIYKTPPIKDFGGF  | 786-800   | PCPIHFYSKWYIRVG  | 36-50   |
| TPPIKDFGGFNFSQI  | 791-805   | FYSKWYIRVGARKSA  | 41-55   |
| NFSQILPDPSPSKR   | 801-815   | YIRVGARKSAPLIEL  | 46-60   |
| AGFIKQYGDCLGDIA  | 831-845   | ARKSAPLIELCVDEA  | 51-65   |
| QYGDCLGDIAARDLI  | 836-850   | PLIELCVDEAGSKSP  | 56-70   |
| GAALQIPFAMQMAYR  | 891-905   | CVDEAGSKSPIQYID  | 61-75   |
| QMAYRFNGIGVTQNV  | 901-915   | GSKSPIQYIDIGNYT  | 66-80   |
| FNGIGVTQNVLYENQ  | 906-920   | IQYIDIGNYTVSCLP  | 71-85   |
| DSLSTASALGKLQD   | 936-950   | IGNYTVSCLPFTINC  | 76-90   |
| TASALGKLQDVVNQN  | 941-955   | VSCLPFTINCQEPKL  | 81-95   |
| AQALNTLVKQLSSNF  | 956-970   | FTINCQEPKLGSLVV  | 86-100  |
| VLNDILSRLDKVEAE  | 976-990   | QEPKLGSLVVRCSFY  | 91-105  |
| LITGRLQSLQTYVTQ  | 996-1010  | GSLVVRCSFYEDFLE  | 96-110  |
| QLIRAAEIRASANLA  | 1011-1025 | RCSFYEDFLEYHDVR  | 101-115 |
| AEIRASANLAATKMS  | 1016-1030 | EDFLEYHDVRVLDLF  | 106-120 |
| APHGVVFLHVTVVPA  | 1056-1070 | YHDVRVLDLFI      | 111-121 |

|                 |           |  |  |
|-----------------|-----------|--|--|
| HWFVTQRNFYEPQII | 1101-1115 |  |  |
| KEIDRLNEVAKNLNE | 1181-1195 |  |  |
| LNEVAKNLNESLIDL | 1186-1200 |  |  |
| KNLNESLIDLQELGK | 1191-1205 |  |  |
| IWLGFIAGLIAIVMV | 1216-1230 |  |  |
